# Supplementary material for: Acceptability of placebo multiparticulate formulations in children and adults
Source: Springer Nature journal article supplement (doi:10.1038/s41598-018-27446-6), 2018-06-11
Supplement: MOESM1 [file 41598_2018_27446_MOESM1_ESM.pdf]

## **Acceptability of placebo multiparticulate formulations in children and adults**

Felipe L. Lopez<sup>a</sup>, Punam Mistry<sup>b</sup>, Hannah K. Batchelor<sup>b</sup>, Joanne Bennett<sup>c</sup>, Alastair Coupe<sup>c</sup>,  
Terry B. Ernest<sup>d</sup>, Mine Orlu<sup>a</sup>, Catherine Tuleu<sup>a,\*</sup>.

Affiliations: <sup>a</sup>School of Pharmacy, University College London, London, United Kingdom.

<sup>b</sup>School of Pharmacy, Institute of Clinical Sciences, University of Birmingham, Birmingham, United Kingdom. <sup>c</sup>Pfizer Global R&D, Sandwich, Kent, United Kingdom. <sup>d</sup>GlaxoSmithKline, Harlow, Essex, United Kingdom.

\* Corresponding author: Catherine Tuleu, UCL School of Pharmacy, 29-39 Brunswick Square, London, WC1N 1AX, United Kingdom, [c.tuleu@ucl.ac.uk], +44(0)20 7753 5857.

## Supplementary information

Demographic characteristics of the study participants.

| Session       | Children |                             |                            | Adults |                             |                            |
|---------------|----------|-----------------------------|----------------------------|--------|-----------------------------|----------------------------|
|               | N        | Age (years)<br>Ave $\pm$ SD | Age (years)<br>Min. - Max. | N      | Age (years)<br>Ave $\pm$ SD | Age (years)<br>Min. - Max. |
| 1             | 9        | 6.6 $\pm$ 1.7               | 4 - 9                      | 6      | 25.3 $\pm$ 5.2              | 21 - 35                    |
| 2             | 13       | 8.2 $\pm$ 2.2               | 5 - 12                     | 12     | 23.0 $\pm$ 5.3              | 19 - 37                    |
| 3             | 8        | 6.6 $\pm$ 2.2               | 4 - 10                     | 8      | 20.6 $\pm$ 3.0              | 18 - 27                    |
| 4             | 7        | 7.0 $\pm$ 2.1               | 5 - 11                     | 7      | 20.7 $\pm$ 2.1              | 18 - 25                    |
| Phase 1 total | 37       | 7.2 $\pm$ 2.1               | 4 - 12                     | 33     | 22.4 $\pm$ 4.5              | 18 - 37                    |
| 5             | 8        | 7.1 $\pm$ 2.3               | 4 - 10                     | 7      | 23.6 $\pm$ 4.9              | 19 - 30                    |
| 6             | 7        | 8.7 $\pm$ 2.0               | 6 - 11                     | 7      | 24.7 $\pm$ 4.3              | 20 - 32                    |
| 7             | 12       | 6.8 $\pm$ 1.5               | 4 - 9                      | 6      | 26.5 $\pm$ 4.3              | 24 - 35                    |
| 8             | 7        | 6.9 $\pm$ 2.4               | 4 - 11                     | 8      | 26.6 $\pm$ 4.9              | 20 - 34                    |
| Phase 2 total | 34       | 7.3 $\pm$ 2.1               | 4 - 11                     | 28     | 25.4 $\pm$ 4.6              | 19 - 35                    |
| Grand total   | 71       | 7.2 $\pm$ 4.0               | 4 - 12                     | 61     | 23.7 $\pm$ 4.7              | 18 - 37                    |

The ages of the volunteers that participated in the study are shown in the histograms below:

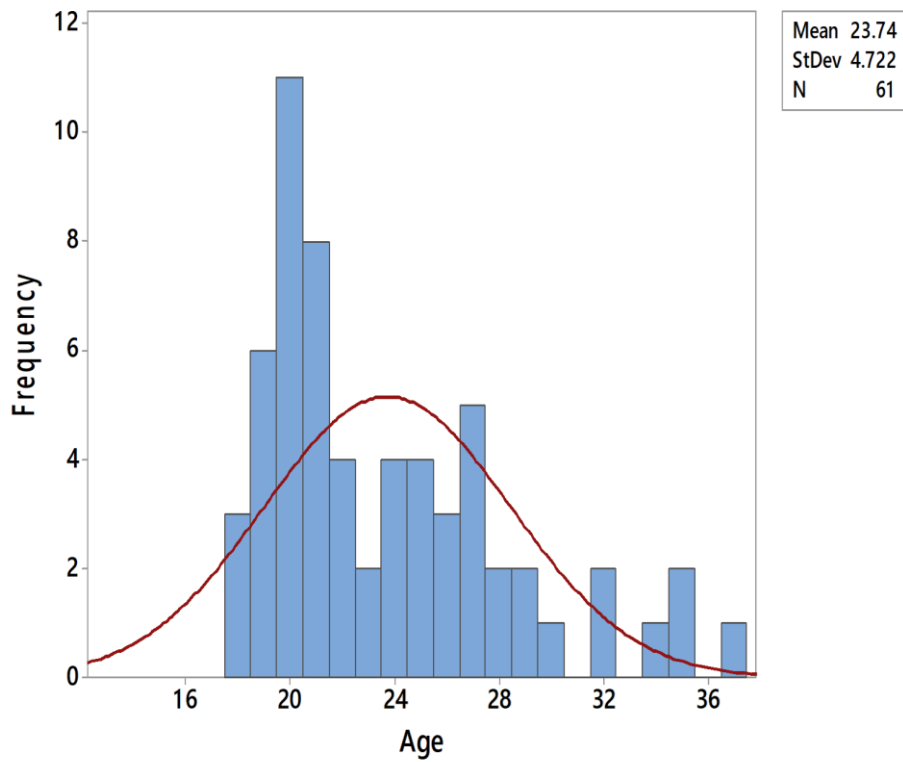

Figure 1. Histogram of age for adult participants.

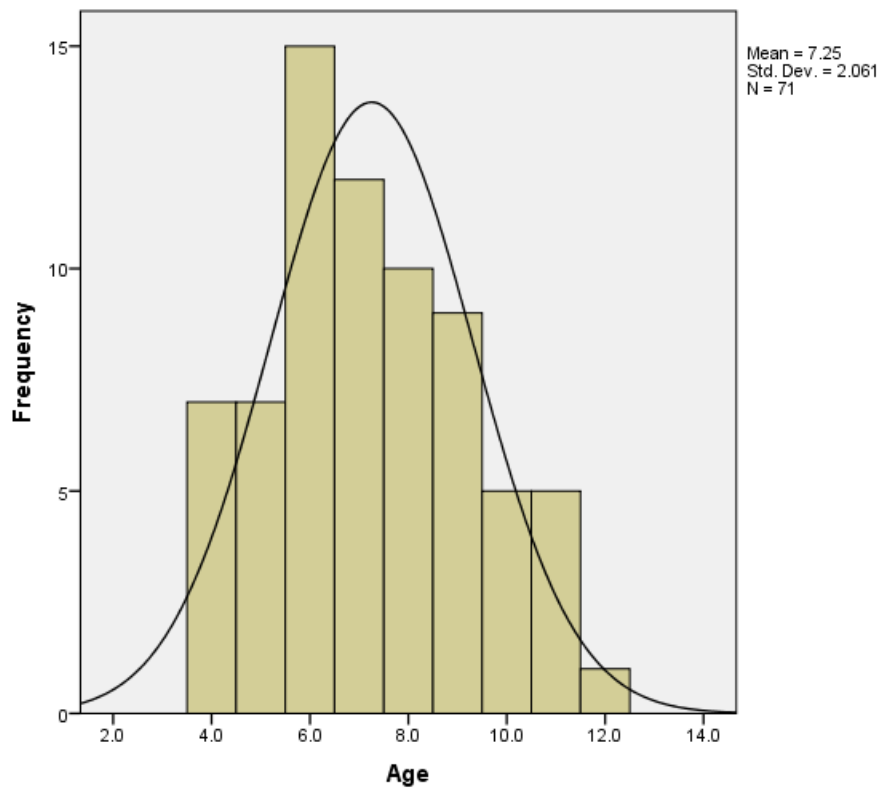

Figure 2. Histogram of age for children participants.
